# Supplementary material for: MicroRNA targets in Drosophila
Source: Springer Nature journal article supplement (doi:10.1186/gb-2003-5-1-r1), 2003-12-12
Supplement: 13059_2003_805_MOESM2_ESM.pdf [file 13059_2003_805_MOESM2_ESM.pdf]

## Supplementary Figure - miRNA Target Network

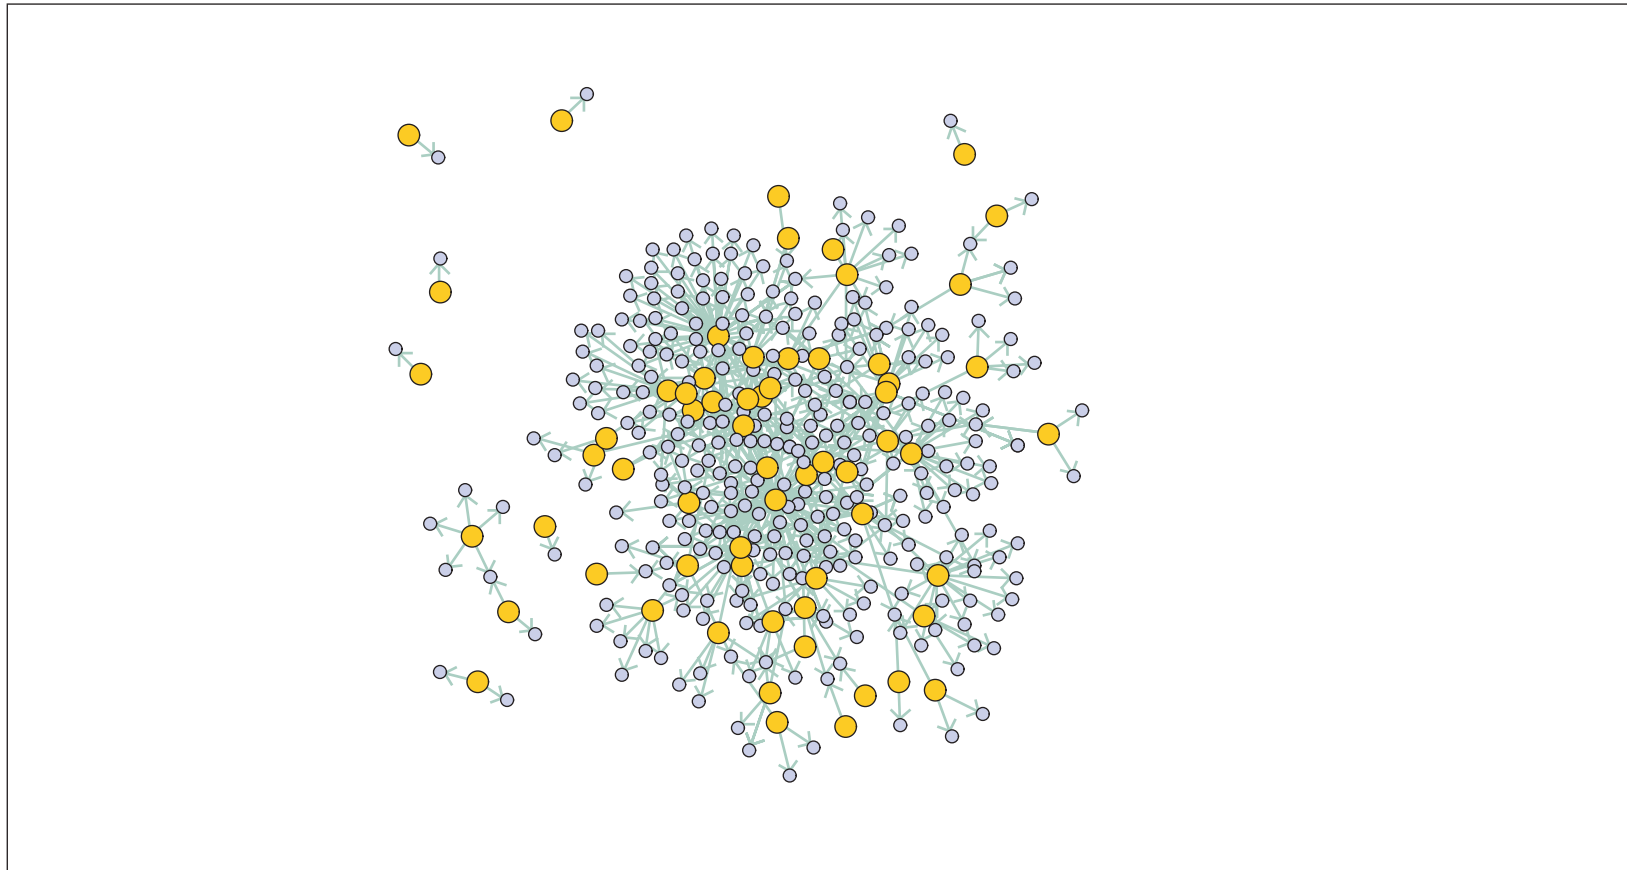

BioLayout Java © EMBL- EBI 2002 (Authors: Ildefonso Cases, Leon Goldovsky & Anton Enright) Please Cite Enright A.J., Ouzounis C.A., Bioinformatics (2001) 17: 853-854

The emergent network of miRNAs (large yellow circles) and their detected target genes (small light blue circles). Results generated using high-ranking (top-10) predictions for miRNAs which have multiple ( $\geq 2$ ) target sites detected. Many miRNAs coordinate with other miRNAs and target the same genes, (miRNAs in the center of the plot), while others target different sets of genes (edges of the plot).
