# Supplementary figures and images for: MicroRNA targets in Drosophila
Source: Springer Nature journal article supplement (doi:10.1186/gb-2003-5-1-r1), 2003-12-12

# Supplementary Figure - Biological Process GO

Functional Class (GO)

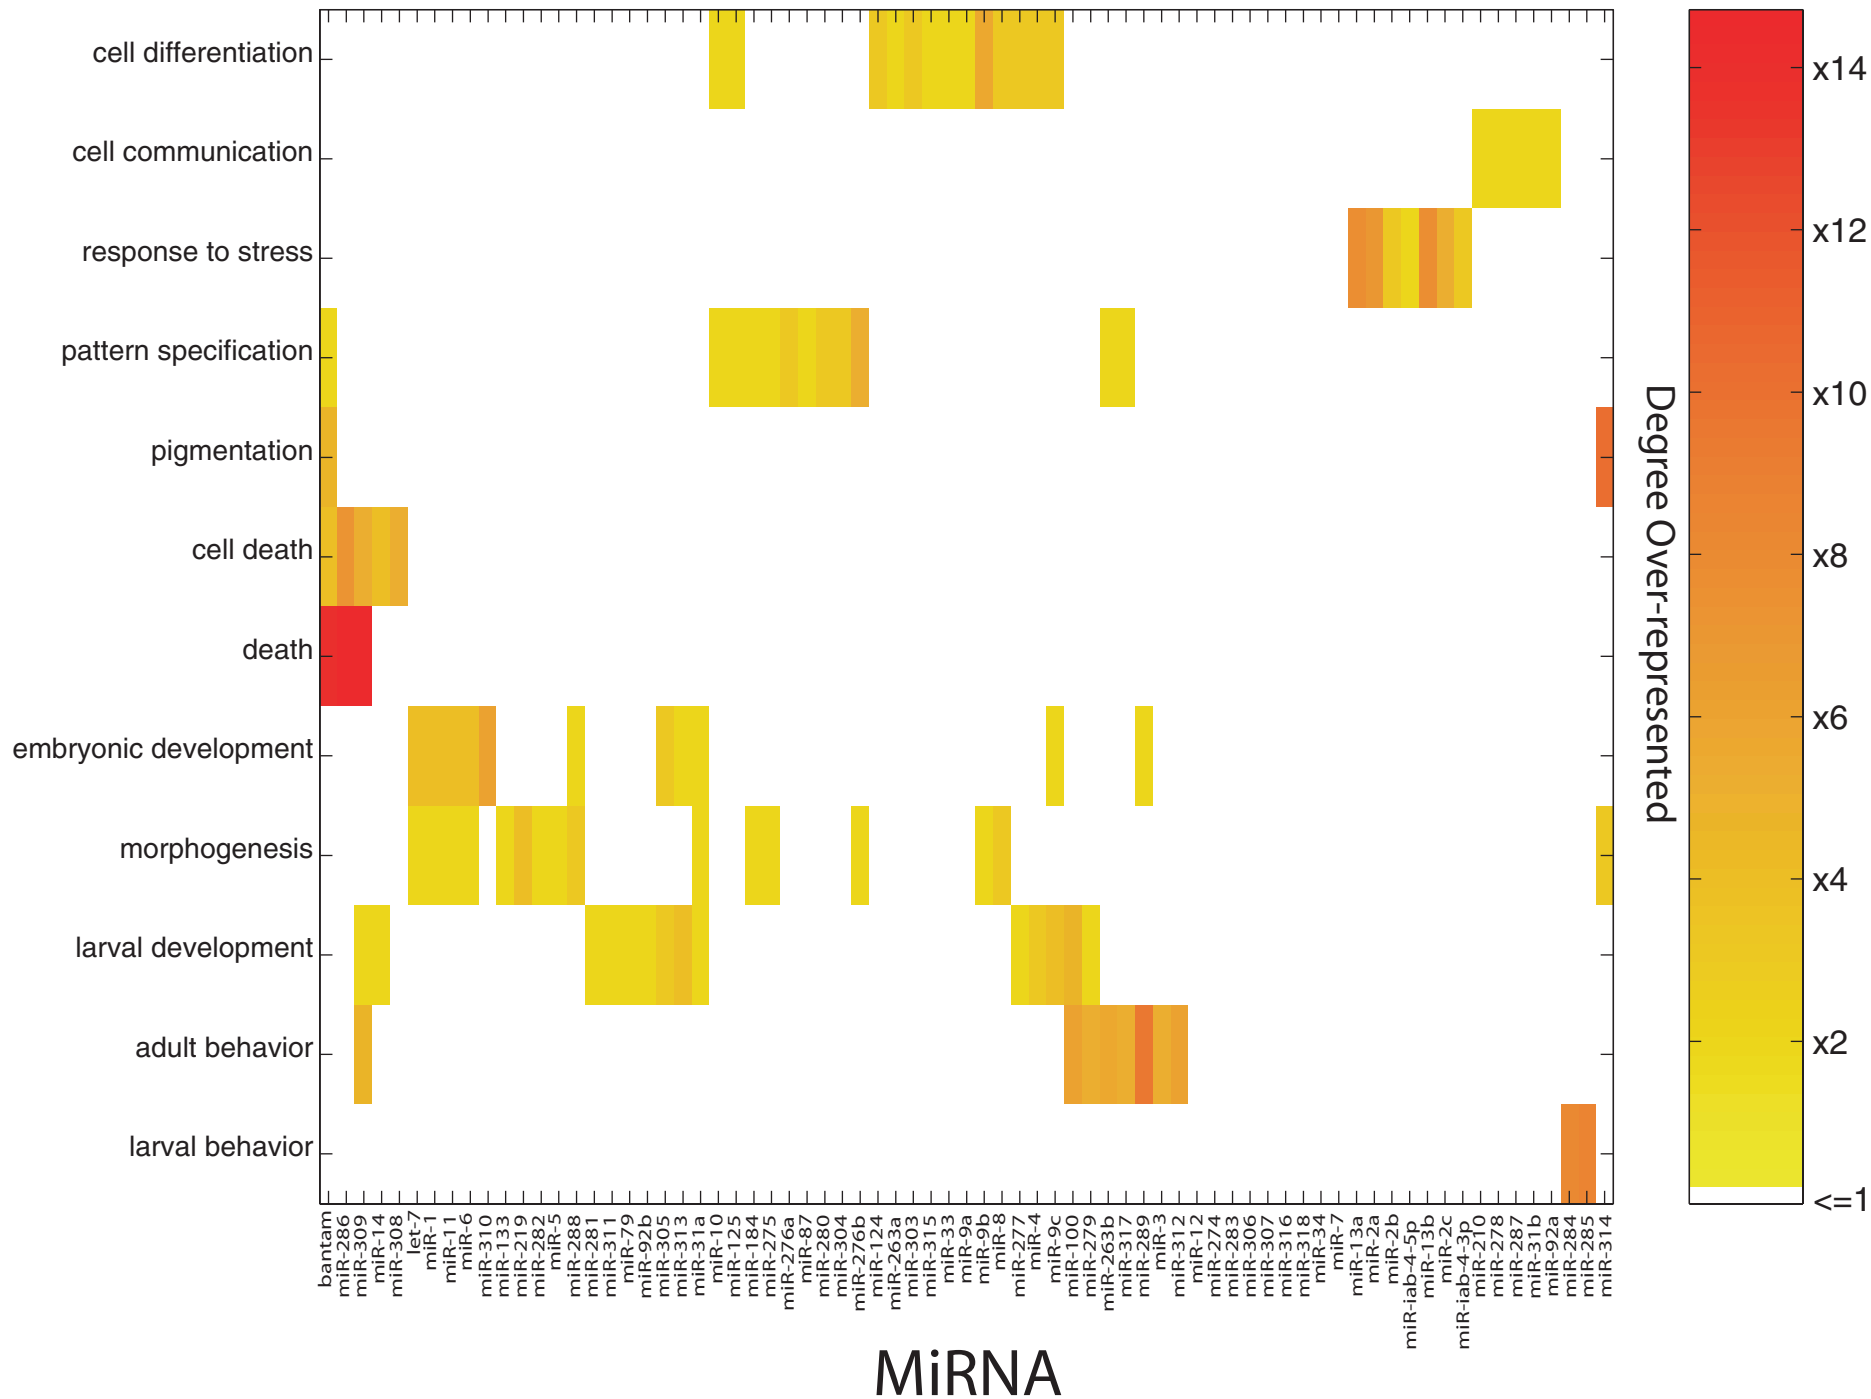

Supplement: 13059_2003_805_MOESM1_ESM.pdf [file 13059_2003_805_MOESM1_ESM.pdf]
